# Supplementary material for: Disease evolution and organ damage accrual in patients with stable UCTD: a long-term monocentric inception cohort
Source: PubMed Central journal article supplement (PMC11057319; doi:10.1136/rmdopen-2023-003967), 2024-04-25
Supplement: rmdopen-10-2-s001.pdf [file rmdopen-10-2-s001.pdf]

## Supplementary files

Table S1: serological profile at baseline evaluation of UCTD patients who evolved to CTDs versus not evolved

|              | Evolved to CTDs | Not evolved to CTDs | P *         |
|--------------|-----------------|---------------------|-------------|
| Anti-dsDNA % | 18.7%           | 3.5%                | <b>0.04</b> |
| Anti-Ro %    | 6.25%           | 4.3%                | <b>0.04</b> |
| Anti-La %    | 6.25%           | 4.5%                | Ns          |
| aPL %        | 37.5%           | 23.2%               | Ns          |
| Anti RNP %   | 6.25%           | 0%                  | Ns          |
| Anti- Sm     | 1.8%            | 0%                  | Ns          |

+ Fisher Exact test

Ns: not significant ( $p > 0.05$ )

Table S2: disease characteristics of SLE (N=153) patients used as control group

| <b>clinical characteristics</b>                        | <b>% of patients</b> |
|--------------------------------------------------------|----------------------|
| Joint involvement (ever)                               | 68.6%                |
| Muco-cutaneous involvement (ever)                      | 55%                  |
| Hematological involvement (ever)                       | 52.7%                |
| Renal involvement (ever)                               | 43.8%                |
| Cardio-pulmonary involvement (ever)                    | 19.4%                |
| Neuropsychiatric involvement (ever)                    | 11.7%                |
| Patients with active disease (SLEDAI >4) at last visit | 15.8%                |
| Median SLEDAI among active patients                    | 6 (IQR 6-9)          |
| Patients with SDI >0 at last visit                     | 49.6%                |
| Median SDI (among patients with SDI >0)                | 2 (IQR 1-3)          |
| Patients with fibromyalgia                             | 10.8%                |
| Patients with concomitant thyroid disease              | 24.3%                |

Table S3: type of damage at last evaluation

| SLICC-DI Items            |    | Number of patients                                                                                                                                                                                                           |
|---------------------------|----|------------------------------------------------------------------------------------------------------------------------------------------------------------------------------------------------------------------------------|
| Malignancy                | 14 | 3 breast cancer<br>2 non-Hodgkin lymphoma<br>2 thyroid cancer<br>2 non-melanoma skin cancer<br>1 ovarian cancer<br>1 Hodgkin lymphoma<br>1 chronic myeloid leukemia<br>1 myelodysplastic syndrome<br>1 systemic mastocytosis |
| Ocular damage             | 6  | 1 cataract<br>5 retinal changes                                                                                                                                                                                              |
| Neuropsychiatric damage   | 6  | 3 cognitive impairments,<br>1 seizures,<br>2 peripheral neuropathies                                                                                                                                                         |
| Musculoskeletal damage    | 5  | 2 osteoporosis with vertebral fracture,<br>1 osteonecrosis of the hip,<br>1 tendon rupture,<br>1 deforming arthropathy                                                                                                       |
| Gastrointestinal damage   | 3  | 1 splenectomy,<br>1 gastric surgery,<br>1 hemicolectomy                                                                                                                                                                      |
| Cardiovascular damage     | 2  | 1 ventricular dysfunction,<br>1 aortic valvulopathy                                                                                                                                                                          |
| Skin damage               | 1  | skin ulceration                                                                                                                                                                                                              |
| premature ovarian failure | 1  |                                                                                                                                                                                                                              |

Table S4 UCTD Group

|      | Beg.  | Net  |      | Nelson-Aalen |        | Std.             |        |
|------|-------|------|------|--------------|--------|------------------|--------|
| Time | Total | Fail | Lost | Cum. Haz.    | Error  | [95% Conf. Int.] |        |
| 2    | 43    | 1    | 0    | 0.0233       | 0.0233 | 0.0033           | 0.1651 |
| 5    | 42    | 1    | 0    | 0.0471       | 0.0333 | 0.0118           | 0.1882 |
| 7    | 41    | 1    | 0    | 0.0715       | 0.0413 | 0.0230           | 0.2216 |
| 8    | 40    | 1    | 0    | 0.0965       | 0.0482 | 0.0362           | 0.2571 |
| 9    | 39    | 3    | 0    | 0.1734       | 0.0656 | 0.0826           | 0.3639 |
| 10   | 36    | 1    | 0    | 0.2012       | 0.0712 | 0.1005           | 0.4026 |
| 11   | 35    | 0    | 30   | 0.2012       | 0.0712 | 0.1005           | 0.4026 |
| 16   | 5     | 0    | 2    | 0.2012       | 0.0712 | 0.1005           | 0.4026 |
| 23   | 3     | 0    | 1    | 0.2012       | 0.0712 | 0.1005           | 0.4026 |
| 25   | 2     | 0    | 1    | 0.2012       | 0.0712 | 0.1005           | 0.4026 |
| 30   | 1     | 0    | 1    | 0.2012       | 0.0712 | 0.1005           | 0.4026 |

Table S5 – SLE Group

|      | Beg.  | Net  |      | Nelson-Aalen | Std.   |                  |        |
|------|-------|------|------|--------------|--------|------------------|--------|
| Time | Total | Fail | Lost | Cum. Haz.    | Error  | [95% Conf. Int.] |        |
| 1    | 85    | 4    | 0    | 0.0471       | 0.0235 | 0.0177           | 0.1254 |
| 2    | 81    | 4    | 0    | 0.0964       | 0.0341 | 0.0482           | 0.1929 |
| 3    | 77    | 3    | 0    | 0.1354       | 0.0409 | 0.0750           | 0.2446 |
| 4    | 74    | 3    | 0    | 0.1759       | 0.0471 | 0.1041           | 0.2973 |
| 5    | 71    | 5    | 0    | 0.2464       | 0.0566 | 0.1570           | 0.3866 |
| 6    | 66    | 5    | 0    | 0.3221       | 0.0660 | 0.2156           | 0.4813 |
| 8    | 61    | 3    | 0    | 0.3713       | 0.0719 | 0.2541           | 0.5426 |
| 9    | 58    | 6    | 0    | 0.4748       | 0.0833 | 0.3365           | 0.6697 |
| 10   | 52    | 1    | 0    | 0.4940       | 0.0855 | 0.3518           | 0.6936 |
| 11   | 51    | 0    | 35   | 0.4940       | 0.0855 | 0.3518           | 0.6936 |
| 12   | 16    | 0    | 3    | 0.4940       | 0.0855 | 0.3518           | 0.6936 |
| 13   | 13    | 0    | 2    | 0.4940       | 0.0855 | 0.3518           | 0.6936 |
| 14   | 11    | 0    | 2    | 0.4940       | 0.0855 | 0.3518           | 0.6936 |
| 15   | 9     | 0    | 2    | 0.4940       | 0.0855 | 0.3518           | 0.6936 |
| 16   | 7     | 0    | 2    | 0.4940       | 0.0855 | 0.3518           | 0.6936 |
| 17   | 5     | 0    | 1    | 0.4940       | 0.0855 | 0.3518           | 0.6936 |
| 18   | 4     | 0    | 2    | 0.4940       | 0.0855 | 0.3518           | 0.6936 |
| 20   | 2     | 0    | 1    | 0.4940       | 0.0855 | 0.3518           | 0.6936 |
| 22   | 1     | 0    | 1    | 0.4940       | 0.0855 | 0.3518           | 0.6936 |
